# Supplementary material for: Facile synthesis of CuONPs using Citrus limon juice for enhancing antibacterial activity against methicillin-resistant Staphylococcus aureus , beta-lactamase and tetracycline-resistant Escherichia coli
Source: Royal Society of Chemistry journal article supplement (doi:10.1039/d3ra04985j), 2023-01-01
Supplement: d3ra04985j1.pdf [file d3ra04985j1.pdf]

## Supplementary Information's

### Facile Synthesis of CuONPs using *Citrus limon* Juice for Enhancing Antibacterial Activity against Methicillin-resistant *Staphylococcus aureus*, Beta-lactamase and Tetracycline-resistant *Escherichia coli*

Abdullah Rafsan <sup>a†</sup>, Aminur Rahman <sup>a†</sup>, Samia Akter <sup>a</sup>, Nymul Yeachin <sup>b</sup>, Tania Faruque <sup>c</sup>, Gautam Kumar Deb <sup>d</sup>, Taehyeong Ha <sup>e</sup>, Khandker Saadat Hossain <sup>b</sup>, Muhammad Tofazzal Hossain <sup>a</sup>, Md. Abdul Kafi <sup>a\*</sup>, Jeong-Woo Choi <sup>e\*</sup>

<sup>a</sup> Department of Microbiology and Hygiene, Bangladesh Agricultural University, Mymensingh-2202, Bangladesh.

<sup>b</sup> Department of Physics, University of Dhaka, Dhaka-1000, Bangladesh.

<sup>c</sup> Experimental Physics Division, Atomic Energy Centre, Dhaka, Bangladesh

<sup>d</sup> Department of Biotechnology, Bangladesh Livestock Research Institute, Savar, 1341, Dhaka, Bangladesh.

<sup>e</sup> Department of Chemical and Biomolecular Engineering, Graduate School of Management of Technology, Sogang University, 35 Baekbeom-Ro, Mapo-Gu, Seoul 04107, South Korea.

<sup>†</sup>Abdullah Rafsan and Aminur Rahman have equal contribution

\*Corresponding Author

Md. Abdul Kafi

Professor

Department of Microbiology and Hygiene

Bangladesh Agricultural University

Mymensingh-2202

Cell no.: +8801717007975

Email: [makafi2003@bau.edu.bd](mailto:makafi2003@bau.edu.bd)

Web link: <https://vmh.bau.edu.bd/pages/faculty>

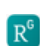

: [https://www.researchgate.net/profile/Md\\_Abdul\\_Kafi](https://www.researchgate.net/profile/Md_Abdul_Kafi)

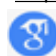

: <https://scholar.google.com/citations?user=dfdJctQAAAAJ&hl=en>

&

Prof. Jeong-Woo Choi, Ph.D. D.Eng. DBA

Dean, College of Engineering

Dean, Graduate School of Information & Technology

Department of Chemical and Biomolecular Engineering, Graduate School of Management of Technology

Sogang University, 35 Baekbeom-Ro, Mapo-Gu, Seoul 04107, South Korea

Tel: +82-2-705-8480, (Center) Tel:+82-2-705-7869, Fax: +82-2-3273-0331

e-mail: [jwchoi@sogang.ac.kr](mailto:jwchoi@sogang.ac.kr), HP: <http://nbel.sogang.ac.kr/>

|                                     |        |
|-------------------------------------|--------|
| Master mixture (Go Taq® green, 2X): | 12.5µl |
| Nuclease free water                 | 5.5µl  |
| Forward primer                      | 1µl    |
| Reversed primer                     | 1µl    |
| DND template                        | 5µl    |

**Table S1.** Preparation of PCR mixture (25µl)

**Thermal profile for the amplification:** Thermal profiles used for determination of multidrug resistance gene-specific primers were given in the table below.

**Table S2.** Thermal profile for amplification of the gene used to detect *S. aureus* and *E. coli*

| Name of the bacteria | Target gene          | Thermal profile                                                                                                                                                                                                       | Amplicon size | Reference |
|----------------------|----------------------|-----------------------------------------------------------------------------------------------------------------------------------------------------------------------------------------------------------------------|---------------|-----------|
| <i>S. aureus</i>     | <i>16s rRNA</i> gene | Initial denaturation at 94°C for 5mins; followed by 30 cycles of denaturation at 94°C for 30secs, annealing at 52°C for 30secs and extension at 72°C for 30secs. The final extension was conducted at 72°C for 5mins. | 228 bp        | 1         |
| <i>S. aureus</i>     | <i>mecA</i> gene     | Initial denaturation at 94°C for 5mins; followed by 30 cycles of denaturation at 94°C for 30secs, annealing at 52°C for 30secs and extension at 72°C for 30secs. The final extension was conducted at 72°C for 5mins. | 163 bp        | 2         |
| <i>E. coli</i>       | <i>malB</i> gene     | Initial denaturation at 95°C for 5mins; followed by 30 cycles of denaturation at 94°C for 45secs, annealing at 55°C for 45secs and extension at 72°C for 1min. The final extension was conducted at 72°C for 5mins.   | 585 bp        | 3         |

**Table S3.** Thermal profile for the detection of antibiotic resistant gene for *tetA* and *blaTEM-1*

| Target gene           | Thermal profile                                                                                                                                                                                                     | Amplicon size | Reference |
|-----------------------|---------------------------------------------------------------------------------------------------------------------------------------------------------------------------------------------------------------------|---------------|-----------|
| <i>Bla TEM-1</i> gene | Initial denaturation at 95°C for 5mins; followed by 30 cycles of denaturation at 94°C for 45secs, annealing at 55°C for 45secs and extension at 72°C for 1min. The final extension was conducted at 72°C for 5mins. | 643bp         | 4         |
| <i>tetA</i> gene      | Initial denaturation at 95°C for 5mins; followed by 30 cycles of denaturation at 94°C for 45secs, annealing at 55°C for 45secs and extension at 72°C for 1min. The final extension was conducted at 72°C for 5mins. | 577bp         | 5         |

**Table S4.** List of antibiotics with their groups, generation, and sensitive (S) or resistant (R) to isolated bacteria

| Group of antibiotics | Name of antibiotics   | Generation      | Name of the isolate |                |
|----------------------|-----------------------|-----------------|---------------------|----------------|
|                      |                       |                 | <i>S. aureus</i>    | <i>E. coli</i> |
| Sulfonamides         | Trimethoprim (COT-25) | NGC             | R                   | R              |
| Cephalosporin        | Cefuroxime (CXM-30)   | 2 <sup>nd</sup> | R                   | R              |
|                      | Cefotaxime (CTX--30)  | 3 <sup>rd</sup> | S                   | R              |
|                      | Cefixime (CFM-5)      | 3 <sup>rd</sup> | R                   | R              |
| Oxazolidinone        | Linezolid (LZ-30)     | NGC             | R                   | R              |
| Aminoglycoside       | Kanamycin (K-30)      | NGC             | S                   | S              |
| Quinolones           | Ciprofloxacin (CIP-5) | 2 <sup>nd</sup> | S                   | S              |
|                      | Levofloxacin (LE-5)   | 3 <sup>rd</sup> | S                   | S              |

|                     |                     |                 |   |   |
|---------------------|---------------------|-----------------|---|---|
| <b>Macrolides</b>   | Erythromycin (E-15) | NGC             | R | R |
| <b>Penicillin</b>   | Oxacillin (OX- 30)  | 2 <sup>nd</sup> | R | R |
|                     | Ampicillin (AMP-10) | 3 <sup>rd</sup> | R | R |
| <b>Lincosamides</b> | Clindamycin (CD -2) | NGC             | R | R |

R= Resistant; S= Sensitive

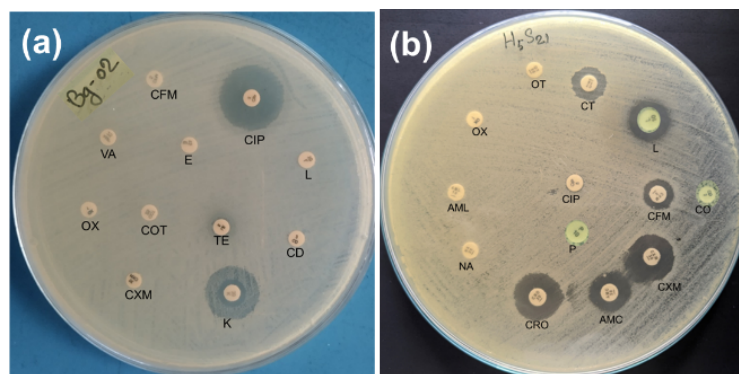

**Fig. S1** Determination of MDR pattern using 12 commercially available antibiotics of a) *Staphylococcus aureus* and b) *Escherichia coli*

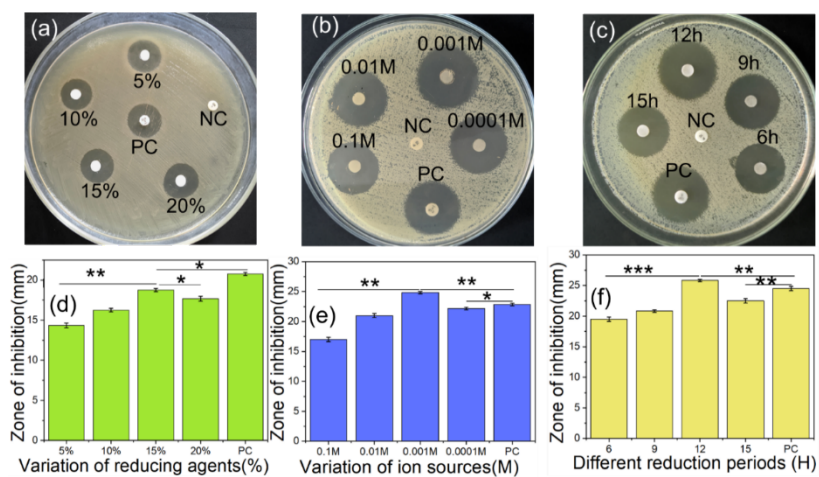

**Fig. S2** Visual representation of antibacterial effect of CuONPs based on a) reducing agent concentration, b) concentration of ion source, and c) reduction periods, and respective differences in zone of inhibition size (d – f).

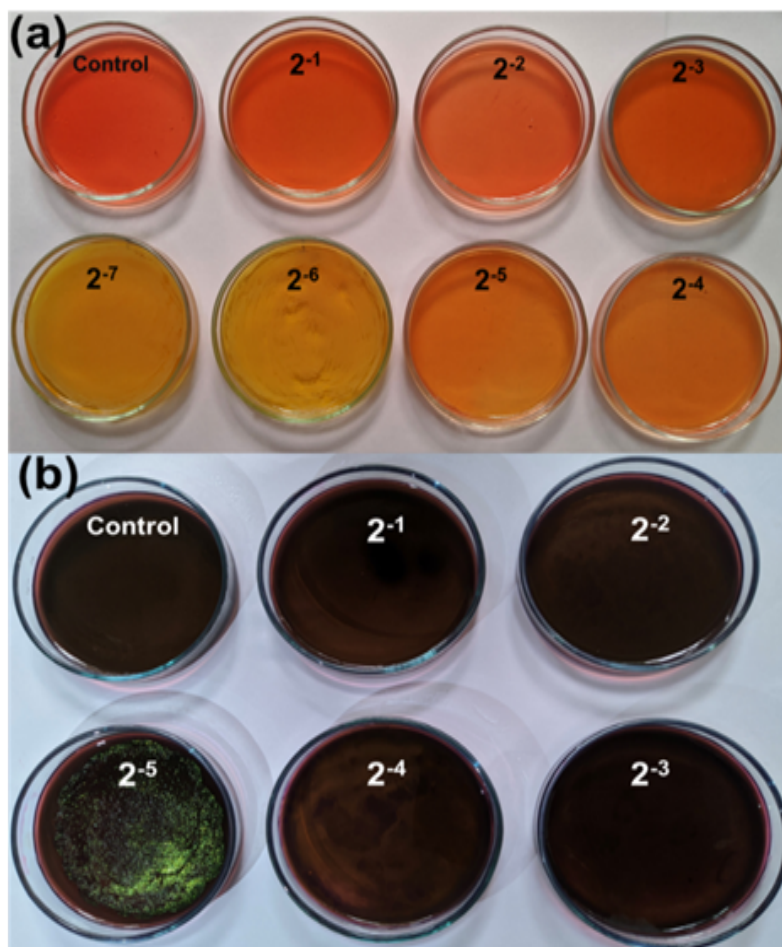

**Fig. S3** Determination of MBC against MDR a) *Staphylococcus aureus* and, b) *Escherichia coli*

#### References

- 1 S. R. Monday and G. A. Bohach, *J. Clin. Microbiol.*, 1999, **37**, 3411–3414.
- 2 M. Mehrotra, G. Wang and W. M. Johnson, *J. Clin. Microbiol.*, 2000, **38**, 1032–1035.
- 3 X. Jiang, R. Wang, Y. Wang, X. Su, Y. Ying, J. Wang and Y. Li, *Biosens. Bioelectron.*, 2011, **29**, 23–28.
- 4 M. A. Saeed, A. Haque, A. Ali, M. Mohsin, S. Bashir and A. Tariq, *J. Antibiot. (Tokyo)*, 2009, **62**, 319–323.
- 5 K. Hedayatianfard, M. Akhlaghi and H. Sharifiyazdi, *Vet. Res. Forum*, 2014, **5**, 269–275.
